# Supplementary material
Source: publisher figshare collection journal article supplement (https://gsapubs.figshare.com/articles/dataset/_/21183535)
Supplement: Supplementary file 1 [file 1]

Table S1. Sources for the Pleistocene depths used in this study. AHD is the Australian Height Datum, equivalent to Mean Sea Level. This study uses average depth values per reef. An analysis on the uncertainties associated to these average depth values is provided in Hinestroza et al. (2022). Please note that these cores were extracted nearby the sand aprons instead of through the sand aprons.

| Reef     | Code   | Location/<br>Environment | Depth<br>(AHD) | Notes    | Source                        |
|----------|--------|--------------------------|----------------|----------|-------------------------------|
| Wreck    | WRK-3  | Windward                 | 10             | Estimate | (Dechnik et al., 2015)        |
| Wreck    | WRK-2  | Leeward                  | 10             | Estimate | (Dechnik et al., 2015)        |
| Wreck    | WRK-1  | Leeward                  | 10.5           | Estimate | (Dechnik et al., 2015)        |
| Wreck    | WRK-4  | Leeward                  | 10             | Estimate | (Dechnik et al., 2015)        |
| One Tree | OTI-1  | Windward                 | 13.2           | Measured | (Dechnik et al., 2015)        |
| One Tree | OTI-6  | Patch Reef               | 13.6           | Measured | (Dechnik et al., 2015)        |
| One Tree | OTI-5  | Leeward                  | 13.5           | Measured | (Dechnik et al., 2015)        |
| One Tree | OTR8   | Patch reef               | 13.5           | Measured | (Sanborn et al., 2020)        |
| One Tree | OTR-9  | Leeward                  | 13.27          | Measured | (Sanborn et al., 2020)        |
| One Tree | OTR-10 | Leeward                  | 13.56          | Measured | (Sanborn et al., 2020)        |
| One Tree | OTR-11 | Leeward                  | 13.22          | Measured | (Sanborn et al., 2020)        |
| One Tree | OTR-12 | Island                   | 12.57          | Measured | (Sanborn et al., 2020)        |
| One Tree | OTR-13 | Patch Reef               | 12.64          | Measured | (Sanborn et al., 2020)        |
| One Tree | OTR-14 | Windward                 | 11.53          | Measured | (Sanborn et al., 2020)        |
| One Tree | OTR-15 | Leeward                  | 11.98          | Measured | (Sanborn et al., 2020)        |
| One Tree | OTR-16 | Patch Reef               | 11.18          | Measured | (Sanborn et al., 2020)        |
| One Tree | OTR-18 | Windward                 | 11.01          | Measured | (Sanborn et al., 2020)        |
| FitzRoy  | FIT-3  | Windward                 | 10.2           | Measured | (Dechnik et al., 2015)        |
| FitzRoy  | FIT-2  | Leeward                  | 7.4            | Measured | (Dechnik et al., 2015)        |
| Fairfax  | FFX-3  | Windward                 | 8.62           | Measured | (Dechnik et al., 2015)        |
| Fairfax  | FFX-2  | Coral flat               | 10             | Estimate | (Dechnik et al., 2015)        |
| Fairfax  | FFX-1  | Leeward                  | 9.5            | Estimate | (Dechnik et al., 2015)        |
| Heron    |        | Windward                 | 16             | Seismic  | (Smith et al., 1998)          |
| Heron    |        | Eastward                 | 12             | Seismic  | (Smith et al., 1998)          |
| Heron    |        | Leeward                  | 15.3           | Measured | (Salas-Saavedra et al., 2018) |
