# Supplementary material
Source: publisher figshare collection journal article supplement (https://gsapubs.figshare.com/articles/dataset/_/21183535)
Supplement: Supplementary file 2 [file 1]

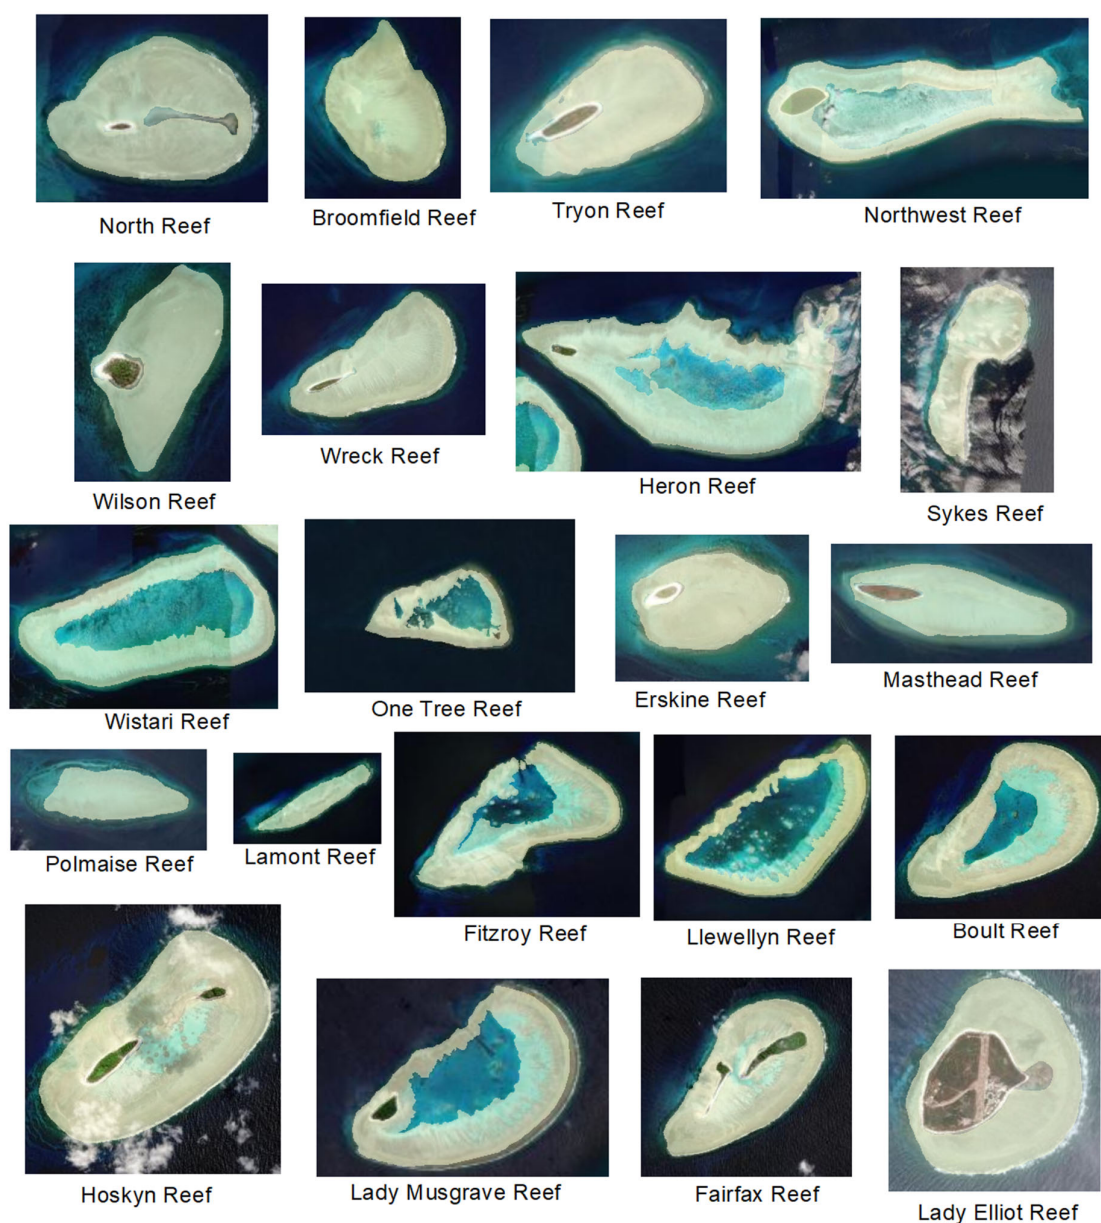

Figure S1. The contours of the reefs and the lagoon were digitised manually for all reefs, focusing on how the sand aprons had infilled the lagoon.
